# Supplementary material for: Intestinal Barrier Impairment Induced by Gut Microbiome and Its Metabolites in School-Age Children with Zinc Deficiency
Source: MDPI journal article supplement (doi:10.3390/nu16091289), 2024-04-26
Supplement: s1 [file s1]

Supplemental Table S1. Functional abundance of the Top20 KEGG level 2 pathways.

| KEGG level 2 pathways                       | ZD      |         | CK      |        | P value |
|---------------------------------------------|---------|---------|---------|--------|---------|
|                                             | Mean    | SEM     | Mean    | SEM    |         |
| Protein Families:                           |         |         |         |        |         |
| Signaling and Cellular Processes            | 60118.4 | 1126.8  | 63541.4 | 630.71 | 0.926   |
| Protein Families:                           |         |         |         |        |         |
| Genetic Information Processing              | 55082.9 | 1281.88 | 59362.5 | 781.49 | 0.194   |
| Carbohydrate Metabolism                     | 35877.8 | 1770.62 | 37165.2 | 585.84 | 0.994   |
| Protein Families:                           |         |         |         |        |         |
| Metabolism                                  | 34291.4 | 1087.63 | 35688.1 | 371.44 | 0.975   |
| Membrane Transport                          | 26610.9 | 818.86  | 31204.3 | 513.24 | 0.152   |
| Signal Transduction                         | 27037.7 | 1043.89 | 24330.1 | 666.13 | <0.001  |
| Amino Acid Metabolism                       | 22568.3 | 823.12  | 24600.5 | 417.44 | 0.005   |
| Metabolism of Cofactors and Vitamins        | 19414.7 | 890.85  | 20238.4 | 477.15 | 0.944   |
| Cellular Community-Prokaryotes              | 18170   | 435.65  | 19802.7 | 278.52 | 0.236   |
| Translation                                 | 17197.5 | 322.47  | 20370.8 | 442.96 | 0.01    |
| Glycan Biosynthesis and Metabolism          | 16638   | 992.31  | 14971.3 | 379.44 | 0.003   |
| Energy Metabolism                           | 13721.6 | 464.95  | 14077.1 | 322    | 0.594   |
| Nucleotide Metabolism                       | 13322.9 | 394.05  | 14330.7 | 291.86 | 0.163   |
| Replication and Repair                      | 12854.9 | 173.57  | 13616.2 | 228.58 | 0.916   |
| Lipid Metabolism                            | 9992.4  | 428.13  | 10331.8 | 250.2  | 0.933   |
| Folding, Sorting and Degradation            | 9394.5  | 268.34  | 10478.3 | 197.2  | 0.002   |
| Drug Resistance: Antimicrobial              | 8882.3  | 293.2   | 8683.4  | 118.45 | <0.001  |
| Metabolism of Other Amino Acids             | 7405.2  | 281.42  | 8050.6  | 164.68 | 0.13    |
| Biosynthesis of Other Secondary Metabolites | 7137.5  | 299.77  | 7139.9  | 134.8  | 0.209   |
| Cell Growth and Death                       | 6457.9  | 165.47  | 5902.4  | 126.61 | <0.001  |

$P < 0.01$ ,  $P < 0.001$ .

Supplemental Table S2. Significant KEGG level 3 pathways between ZD and CK groups.

| KEGG level 3 pathways                                      | baseMean    | log2FoldChange | p value |
|------------------------------------------------------------|-------------|----------------|---------|
| Plant hormone signal transduction                          | 29.23899774 | 1.822873961    | <0.001  |
| Steroid hormone biosynthesis                               | 17.56269741 | 1.791882517    | <0.001  |
| Glycosphingolipid biosynthesis - lacto and neolacto series | 78.47230789 | 1.689129402    | <0.001  |
| Biosynthesis of 12-, 14- and 16-membered macrolides        | 26.23829191 | 1.653803657    | 0.014   |
| Rheumatoid arthritis                                       | 38.66486937 | 1.567792246    | <0.001  |
| Osteoclast differentiation                                 | 40.50911777 | 1.467922599    | <0.001  |
| Flavone and flavonol biosynthesis                          | 102.0765839 | 1.457255311    | <0.001  |
| Biosynthesis of endiayne antibiotics                       | 36.90415727 | 1.377576772    | <0.001  |
| Circadian entrainment                                      | 15.89953932 | 1.31170611     | 0.038   |
| Type I polyketide structures                               | 16.89554529 | 1.27917982     | <0.001  |
| MAPK signaling pathway - fly                               | 26.05939945 | 1.275089355    | 0.002   |
| p53 signaling pathway                                      | 29.71078869 | 1.231237704    | 0.020   |
| Hepatitis C                                                | 24.08896864 | 1.22898501     | 0.017   |
| Meiosis - yeast                                            | 608.3151717 | 1.198858201    | <0.001  |
| Glycosylphosphatidylinositol (GPI)-anchored protein        | 186.0515401 | 1.09433301     | <0.001  |
| Glycosaminoglycan degradation                              | 940.3339347 | 1.088974678    | <0.001  |
| Fluorobenzoate degradation                                 | 39.11897259 | 1.060913138    | 0.001   |
| Penicillin and cephalosporin biosynthesis                  | 175.0103432 | 0.993619581    | <0.001  |
| Lysosome                                                   | 1845.687462 | 0.992000934    | <0.001  |
| Styrene degradation                                        | 119.6231309 | 0.816285148    | 0.007   |
| Apoptosis - fly                                            | 61.72466118 | 0.807839575    | 0.016   |
| Glycosphingolipid biosynthesis - ganglio series            | 466.877759  | 0.77241972     | 0.007   |
| Bacterial chemotaxis                                       | 1133.389454 | 0.707147586    | 0.004   |
| Transcriptional misregulation in cancer                    | 172.6450696 | 0.691933337    | <0.001  |
| Pertussis                                                  | 737.9949817 | 0.661217551    | 0.013   |
| Mannose type O-glycan biosynthesis                         | 113.1915796 | 0.654292161    | 0.025   |
| Prion disease                                              | 190.1114318 | 0.648434087    | 0.001   |
| Shigellosis                                                | 58.93671284 | 0.647631348    | 0.034   |
| Sphingolipid metabolism                                    | 1969.531555 | 0.643797868    | <0.001  |
| Non-alcoholic fatty liver disease                          | 142.7569434 | 0.637929197    | <0.001  |
| Amyotrophic lateral sclerosis                              | 340.8012742 | 0.620743865    | <0.001  |
| Longevity regulating pathway - multiple species            | 1122.992913 | 0.599995303    | <0.001  |
| Cardiac muscle contraction                                 | 147.6023197 | 0.597693147    | 0.009   |
| Other glycan degradation                                   | 3065.592744 | 0.583811529    | <0.001  |
| Cationic antimicrobial peptide (CAMP) resistance           | 2571.964656 | 0.575930208    | <0.001  |
| Thyroid hormone synthesis                                  | 97.35016205 | 0.562407394    | <0.001  |
| Lipopolysaccharide biosynthesis protein                    | 1905.845278 | 0.543174575    | 0.015   |
| CD molecule                                                | 275.0326468 | 0.533933233    | 0.016   |
| Lipopolysaccharide biosynthesis                            | 2054.37605  | 0.530623488    | 0.007   |
| Huntington disease                                         | 292.8385966 | 0.507152698    | 0.003   |
| Ubiquinone and other terpenoid-quinone biosynthesis        | 660.0785514 | 0.458542014    | 0.024   |
| Glycosphingolipid biosynthesis - globo and isoglobo series | 871.091396  | 0.450737349    | 0.040   |
| beta-Lactam resistance                                     | 3898.562562 | 0.427838436    | <0.001  |
| Protein digestion and absorption                           | 458.5463589 | 0.386370355    | 0.035   |
| Cyanosine acid metabolism                                  | 1806.749256 | 0.379415505    | <0.001  |
| NOD-like receptor signaling pathway                        | 534.0137373 | 0.366361456    | <0.001  |
| Transcription machiner                                     | 3134.090678 | 0.356645056    | 0.001   |
| Antigen processing and presentation                        | 192.2288766 | 0.352325838    | 0.029   |
| Pathways of neurodegeneration - multiple diseases          | 426.645223  | 0.351325566    | 0.041   |
| Small cell lung cancer                                     | 135.2825236 | 0.346640529    | 0.022   |
| Protein phosphatases and associated protein                | 545.3810115 | 0.33175052     | 0.015   |
| Parathyroid hormone synthesis, secretion and action        | 197.0760696 | 0.321093792    | 0.047   |
| Phenylpropanoid biosynthesis                               | 1305.004153 | 0.318572419    | 0.003   |
| Spliceosome                                                | 486.6262861 | 0.302432952    | 0.014   |
| Biosynthesis of various secondary metabolites - part 2     | 682.2407815 | 0.3002109      | 0.002   |
| Gastric cancer                                             | 137.9955304 | 0.296631635    | 0.031   |
| Fluid shear stress and atherosclerosis                     | 773.1607016 | 0.294201922    | <0.001  |
| Citrate cycle (TCA cycle)                                  | 1692.070835 | 0.291453566    | <0.001  |
| Biofilm formation - Pseudomonas aeruginosa                 | 3161.832157 | 0.285082276    | 0.016   |
| Pathogenic Escherichia coli infection                      | 379.7796246 | 0.279876322    | 0.046   |
| Th17 cell differentiation                                  | 183.195596  | 0.273811008    | 0.041   |
| Fanconi anemia pathway                                     | 818.9131385 | 0.271708118    | 0.010   |
| Prostate cancer                                            | 205.7479817 | 0.267104594    | 0.026   |
| Antimicrobial resistance gene                              | 4383.405457 | 0.255227878    | <0.001  |
| Two-component system                                       | 22298.01833 | 0.251807483    | <0.001  |
| IL-17 signaling pathway                                    | 204.2831792 | 0.251636835    | 0.043   |
| Lysine degradation                                         | 378.284903  | 0.247079898    | 0.030   |
| Colorectal cancer                                          | 207.4182537 | 0.241374899    | 0.030   |
| Progesterone-mediated oocyte maturation                    | 220.7896584 | 0.24030304     | 0.024   |
| Pentose and glucuronate interconversions                   | 2985.559847 | 0.219320404    | 0.009   |
| Carbon fixation pathways in prokaryotes                    | 2515.066879 | 0.20685288     | 0.016   |
| Salmonella infection                                       | 665.6936641 | 0.196899667    | 0.035   |
| Thermogenesis                                              | 660.2691598 | 0.196357019    | 0.014   |
| Nitrogen metabolism                                        | 1992.320403 | 0.19159027     | 0.001   |
| Two-component syste                                        | 12702.50677 | 0.18326973     | 0.029   |
| Plant-pathogen interaction                                 | 994.5192193 | 0.178886053    | 0.016   |
| RNA transport                                              | 1091.613131 | 0.17397997     | 0.007   |
| Peroxisome                                                 | 786.910544  | 0.168398397    | 0.035   |
| O-Antigen nucleotide sugar biosynthesis                    | 3139.291763 | 0.149450558    | 0.013   |
| Arginine and proline metabolism                            | 1711.478481 | -0.105631115   | 0.026   |
| Lysine biosynthesis                                        | 2846.505281 | -0.107803222   | 0.015   |
| Nucleotide excision repair                                 | 2918.887704 | -0.122331186   | 0.041   |
| Pyruvate metabolism                                        | 4416.865039 | -0.125241875   | 0.010   |
| Monobactam biosynthesis                                    | 850.0710415 | -0.125632314   | 0.024   |
| One carbon pool by folate                                  | 2811.24074  | -0.126859104   | 0.022   |
| Glycine, serine and threonine metabolism                   | 3443.355904 | -0.131971345   | 0.046   |
| Glucagon signaling pathway                                 | 942.689963  | -0.146757508   | 0.029   |
| Pantothenate and CoA biosynthesis                          | 2019.9159   | -0.151543917   | 0.026   |
| Ribosome biogenesis in eukaryotes                          | 756.6929349 | -0.17190119    | 0.020   |
| Cysteine and methionine metabolism                         | 5920.515669 | -0.180811872   | 0.006   |
| Protein export                                             | 3460.48876  | -0.181638492   | 0.031   |
| Streptomycin biosynthesis                                  | 2112.257183 | -0.18177678    | 0.001   |
| Acarbose and validamycin biosynthesis                      | 633.191057  | -0.19464878    | 0.005   |
| Inositol phosphate metabolism                              | 754.3250337 | -0.195983695   | 0.023   |
| Prodigiosin biosynthesis                                   | 368.3282771 | -0.200519216   | 0.042   |
| Glycerolipid metabolism                                    | 2254.974004 | -0.204257899   | 0.001   |
| Selenocompound metabolism                                  | 1831.902037 | -0.212210216   | 0.001   |
| Ribosome                                                   | 10420.12496 | -0.214490154   | 0.037   |
| Ribosome                                                   | 10420.12496 | -0.214490154   | 0.037   |
| Insulin resistance                                         | 651.9703287 | -0.222763565   | <0.001  |
| Diabetic cardiomyopathy                                    | 762.0135933 | -0.230995989   | 0.019   |
| Peptidoglycan biosynthesis                                 | 4268.497189 | -0.234773772   | <0.001  |
| Type II diabetes mellitus                                  | 215.1053608 | -0.249804805   | 0.016   |
| Peptidoglycan biosynthesis and degradation protein         | 5425.058941 | -0.262642416   | <0.001  |
| Valine, leucine and isoleucine biosynthesis                | 1787.465205 | -0.292500112   | 0.007   |
| N-Glycan biosynthesis                                      | 699.753389  | -0.294013418   | 0.010   |
| Human papillomavirus infection                             | 297.6315322 | -0.296140848   | 0.022   |
| Chloroalkane and chloroalkene degradation                  | 624.9379236 | -0.310867273   | 0.014   |
| RNA polymerase                                             | 917.6796533 | -0.335793852   | <0.001  |
| Vancomycin resistance                                      | 3032.597186 | -0.35841131    | <0.001  |
| Bacterial invasion of epithelial cells                     | 345.6862325 | -0.398400493   | 0.046   |
| Primary bile acid biosynthesis                             | 369.826344  | -0.413433351   | 0.020   |
| Hypertrophic cardiomyopathy                                | 201.375992  | -0.436990799   | <0.001  |
| Secondary bile acid biosynthesis                           | 635.5351555 | -0.478409139   | <0.001  |
| Neomycin, kanamycin and gentamicin biosynthesis            | 623.2884822 | -0.478561334   | <0.001  |
| Prolactin signaling pathway                                | 167.4342021 | -0.483448318   | 0.001   |
| Biosynthesis of unsaturated fatty acids                    | 352.4939873 | -0.486668013   | 0.001   |
| Ether lipid metabolism                                     | 172.7147769 | -0.489517328   | 0.016   |
| Dilated cardiomyopathy                                     | 106.3264077 | -0.494524166   | <0.001  |
| D-Alanine metabolism                                       | 1316.9802   | -0.496795529   | <0.001  |
| Tight junction                                             | 238.224345  | -0.499979962   | 0.008   |
| Aminobenzoate degradation                                  | 366.2778083 | -0.588541533   | <0.001  |
| Ubiquitin syste                                            | 154.1186377 | -0.675000158   | 0.003   |
| Renin secretion                                            | 37.22628646 | -0.677139441   | 0.010   |
| Naphthalene degradation                                    | 168.2474856 | -0.704282715   | <0.001  |
| Domain-containing proteins not elsewhere classifc          | 74.68550191 | -0.714361169   | 0.043   |
| Phosphotransferase system (PTS)                            | 2376.197674 | -0.749884633   | <0.001  |
| Chagas disease                                             | 107.9047454 | -0.795450298   | 0.006   |
| Cushing syndrome                                           | 69.04396598 | -0.886302246   | 0.003   |
| Acute myeloid leukemia                                     | 10.0991646  | -0.958506444   | 0.020   |
| Staurorsporine biosynthesis                                | 10.86573219 | -1.042377953   | 0.024   |
| Aflatoxin biosynthesis                                     | 25.6778879  | -1.1573433     | 0.005   |
| Proteasome                                                 | 82.93388852 | -1.179093339   | 0.017   |
| Renal cell carcinoma                                       | 40.33022464 | -1.44492579    | <0.001  |

P &lt; 0.01, P &lt; 0.001.
